# Supplementary material for: Integrated Computational Approaches for Drug Design Targeting Cruzipain
Source: MDPI journal article supplement (doi:10.3390/ijms25073747), 2024-03-27
Supplement: s1 [file s1]

**Table S1.** Compounds for QSAR taken from literature.

| No | Compounds                                                                        | SMILES                                                      |
|----|----------------------------------------------------------------------------------|-------------------------------------------------------------|
| 1  | CRUZAIN-IN-1                                                                     | <chem>CCn1cnc2c(Nc3cc(F)cc(F)c3)nc(C#N)nc21</chem>          |
| 2  | 6-(3-Chloroanilino)-9-cyclopentyl-2-purinecarbonitrile                           | <chem>N#Cc1nc(Nc2cccc(Cl)c2)c2ncn(C3CCCC3)c2n1</chem>       |
| 3  | 6-(3-Chloroanilino)-9-ethyl-2-purinecarbonitrile                                 | <chem>CCn1cnc2c(Nc3cccc(Cl)c3)nc(C#N)nc21</chem>            |
| 4  | 4-(3,5-Difluoroanilino)-6-(2,2-difluoroethylamino)-1,3,5-triazine-2-carbonitrile | <chem>N#Cc1nc(NCC(F)F)nc(Nc2cc(F)cc(F)c2)n1</chem>          |
| 5  | 4-(Cyclopentylamino)-6-(3-nitrophenylamino)-1,3,5-triazine-2-carbonitrile        | <chem>N#Cc1nc(Nc2cccc([N+](=O)[O-])c2)nc(NC2CCCC2)n1</chem> |
| 6  | 4-(3-Chlorophenylamino)-6-(cyclopentylamino)-1,3,5-triazine-2-carbonitrile       | <chem>N#Cc1nc(Nc2cccc(Cl)c2)nc(NC2CCCC2)n1</chem>           |
| 7  | 4-(3-Bromophenylamino)-6-(cyclopentylamino)-1,3,5-triazine-2-carbonitrile        | <chem>N#Cc1nc(Nc2cccc(Br)c2)nc(NC2CCCC2)n1</chem>           |
| 8  | 4-(Cyclopentylamino)-6-(3,5-difluorophenylamino)-1,3,5-triazine-2-carbonitrile   | <chem>N#Cc1nc(Nc2cc(F)cc(F)c2)nc(NC2CCCC2)n1</chem>         |
| 9  | 4-(Cyclopentylamino)-6-(3-fluorophenylamino)-1,3,5-triazine-2-carbonitrile       | <chem>N#Cc1nc(Nc2cccc(F)c2)nc(NC2CCCC2)n1</chem>            |
| 10 | 4-(Cyclopentylamino)-6-(3,5-dichlorophenylamino)-1,3,5-triazine-2-carbonitrile   | <chem>N#Cc1nc(Nc2cc(Cl)cc(Cl)c2)nc(NC2CCCC2)n1</chem>       |
| 11 | Cruzain-IN-1                                                                     | <chem>CCn1cnc2c(Nc3cc(F)cc(F)c3)nc(C#N)nc21</chem>          |
| 12 | 6-(3,5-Difluoroanilino)-9-(2,2-difluoroethyl)purine-2-carbonitrile               | <chem>N#Cc1nc(Nc2cc(F)cc(F)c2)c2ncn(CC(F)F)c2n1</chem>      |
| 13 | 9-cyclopentyl-6-(3,5-difluorophenylamino)-9H-purine-2-carbonitrile               | <chem>N#Cc1nc(Nc2cc(F)cc(F)c2)c2ncn(C3CCCC3)c2n1</chem>     |
| 14 | 6-(3-Chloroanilino)-9-ethyl-2-purinecarbonitrile                                 | <chem>CCn1cnc2c(Nc3cccc(Cl)c3)nc(C#N)nc21</chem>            |
| 15 | 4-(3,5-Difluoroanilino)-6-(2,2-difluoroethylamino)-1,3,5-triazine-2-carbonitrile | <chem>N#Cc1nc(NCC(F)F)nc(Nc2cc(F)cc(F)c2)n1</chem>          |
| 16 | 4-(Cyclopentylamino)-6-(m-tolylamino)-1,3,5-triazine-2-carbonitrile              | <chem>Cc1cccc(Nc2nc(C#N)nc(NC3CCCC3)n2)c1</chem>            |
| 17 | 4-(Cyclopentylamino)-6-(4-fluorophenylamino)-1,3,5-triazine-2-carbonitrile       | <chem>N#Cc1nc(Nc2ccc(F)cc2)nc(NC2CCCC2)n1</chem>            |

|    |                                                                                        |                                                             |
|----|----------------------------------------------------------------------------------------|-------------------------------------------------------------|
| 18 | 4-(Cyclopentylamino)-6-(3-(trifluoromethyl) phenylamino)-1,3,5-triazine-2-carbonitrile | <chem>N#Cc1nc(Nc2cccc(C(F)(F)F)c2)nc(NC2CCCC2)n1</chem>     |
| 19 | 6-(3-Chloroanilino)-9-cyclopentyl-2-purinecarbonitrile                                 | <chem>N#Cc1nc(Nc2cccc(Cl)c2)c2ncn(C3CCCC3)c2n1</chem>       |
| 20 | 6-(2,2-difluoroethylamino)-9-(3,5-difluorophenyl)-9H-purine-2-carbonitrile             | <chem>N#Cc1nc(NCC(F)F)c2ncn(-c3cc(F)cc(F)c3)c2n1</chem>     |
| 21 | 4-(Biphenyl-3-ylamino)-6-(cyclopentylamino)-1,3,5-triazine-2-carbonitrile              | <chem>N#Cc1nc(Nc2cccc(-c3ccccc3)c2)nc(NC2CCCC2)n1</chem>    |
| 22 | 4-(4-Bromophenylamino)-6-(cyclopentylamino)-1,3,5-triazine-2-carbonitrile              | <chem>N#Cc1nc(Nc2ccc(Br)cc2)nc(NC2CCCC2)n1</chem>           |
| 23 | 9-(3-chlorophenyl)-6-(ethylamino)-9H-purine-2-carbonitrile                             | <chem>CCNc1nc(C#N)nc2c1ncn2-c1cccc(Cl)c1</chem>             |
| 24 | 4-(Cyclopentylamino)-6-(3,5-difluorophenylamino)-1,3,5-triazine-2-carbonitrile         | <chem>N#Cc1nc(Nc2cc(F)cc(F)c2)nc(NC2CCCC2)n1</chem>         |
| 25 | 4-(Cyclopentylamino)-6-(3-nitrophenylamino)-1,3,5-triazine-2-carbonitrile              | <chem>N#Cc1nc(Nc2cccc([N+](=O)[O-])c2)nc(NC2CCCC2)n1</chem> |
| 26 | 4-Amino-6-(diphenylamino)-1,3,5-triazine-2-carbonitrile                                | <chem>N#Cc1nc(N)nc(N(c2ccccc2)c2ccccc2)n1</chem>            |
| 27 | 9-(3-chlorophenyl)-6-(2,2-difluoroethylamino)-9H-purine-2-carbonitrile                 | <chem>N#Cc1nc(NCC(F)F)c2ncn(-c3cccc(Cl)c3)c2n1</chem>       |
| 28 | 4-(3-Chlorophenylamino)-6-(cyclopentylamino)-1,3,5-triazine-2-carbonitrile             | <chem>N#Cc1nc(Nc2cccc(Cl)c2)nc(NC2CCCC2)n1</chem>           |
| 29 | 4-(Cyclopentylamino)-6-(3-fluorophenylamino)-1,3,5-triazine-2-carbonitrile             | <chem>N#Cc1nc(Nc2cccc(F)c2)nc(NC2CCCC2)n1</chem>            |
| 30 | 4-Ethoxy-6-piperidin-1-yl-1,3,5-triazine-2-carbonitrile                                | <chem>CCOc1nc(C#N)nc(N2CCCCC2)n1</chem>                     |
| 31 | 4-(Cyclopentylamino)-6-(4-fluorophenylamino)-1,3,5-triazine-2-carbonitrile             | <chem>N#Cc1nc(Nc2ccc(F)cc2)nc(NC2CCCC2)n1</chem>            |
| 32 | 4-(Cyclopentylamino)-6-(m-tolylamino)-1,3,5-triazine-2-carbonitrile                    | <chem>Cc1cccc(Nc2nc(C#N)nc(NC3CCCC3)n2)c1</chem>            |
| 33 | 9-(3,5-Difluorophenyl)-6-(ethylamino)-2-purinecarbonitrile                             | <chem>CCNc1nc(C#N)nc2c1ncn2-c1cc(F)cc(F)c1</chem>           |
| 34 | 6-(cyclopentylamino)-9-(3,5-difluorophenyl)-9H-purine-2-carbonitrile                   | <chem>N#Cc1nc(NC2CCCC2)c2ncn(-c3cc(F)cc(F)c3)c2n1</chem>    |

|    |                                                                                |                                                       |
|----|--------------------------------------------------------------------------------|-------------------------------------------------------|
| 35 | 4-(Cyclopentylamino)-6-(3,5-dichlorophenylamino)-1,3,5-triazine-2-carbonitrile | <chem>N#Cc1nc(Nc2cc(Cl)cc(Cl)c2)nc(NC2CCCC2)n1</chem> |
| 36 | 4-(Ethylamino)-6-(phenylamino)-1,3,5-triazine-2-carbonitrile                   | <chem>CCNc1nc(C#N)nc(Nc2ccccc2)n1</chem>              |

**Table S2.** Deep learning model Hyper-parameters optimal values and range.

| Hyper-parameters | Range       | optimal    |
|------------------|-------------|------------|
| CNN filters      | 16 -512     | [32,64,96] |
| CNN kernels      | 4-16        | [4,8,12]   |
| Learning rate    | 0.1 -0.0005 | 0.001      |
| hidden_dim_drug  | 32 - 256    | 128        |
| mpnn_hidden_size | 32-126      | 128        |
| mpnn_depth       | 2-9         | 3          |

**Table S3.** Docking score analysis and molecular interaction of compounds from Deep learning

| S.No    | H-bond interaction | Glide score (Kcal/mol) |
|---------|--------------------|------------------------|
| DB01705 | ASP-161, LEU-160,  | -8.057                 |
| DB03874 | ASP-18             | -6.977                 |
| DB15199 | GLU-117            | -9.394                 |
| DB02559 | ASP-161, TRP-184   | -7.516                 |
| DB03213 | GLY-20, ASP-18,    | -7.409                 |
| DB04710 | GLY-66, ASP-161    | -7.087                 |

|         |                 |        |
|---------|-----------------|--------|
| DB09012 | GLY-66, ASP-161 | -6.857 |
| DB04771 | ASP-18, ASP-161 | -7.524 |
| DB04613 | GLN-19, ASP-161 | -7.375 |
| DB06841 | ASP-161, GLY-66 | -7.579 |

**Table S4.** Docking score analysis and molecular interaction of compounds from Pharmacophore modeling.

| S.No    | H-bond interaction                               | Glide score (Kcal/mol) |
|---------|--------------------------------------------------|------------------------|
| DB00183 | GLY-66, GLN-19, ALA-141                          | -8.104                 |
| DB01167 | GLY-66                                           | -8.834                 |
| DB01846 | ASN-69, GLU-208, GLN-19, ASP-18, TRP-184, GLY-66 | -8.443                 |
| DB02704 | LEU-160, ASP-161, GLN-19, GLN-21                 | -8.217                 |
| DB03395 | ASP-161, SER-64, GLY-66                          | -8.141                 |
| DB03415 | GLY-66, TRP-184, ASP-18, GLN-19, GLN-21          | -8.223                 |
| DB04191 | ASP-161, GLY-66, TRP-184, GLY-20, ASP-18         | -8.563                 |
| DB04593 | ASP-18, GLN-19, TRP-184, ASP-161, HIE-162        | -9.126                 |
| DB04869 | GLY-96                                           | -10.362                |
| DB06763 | GLN-19, SER-64, GLU-117, GLN-120                 | -10.238                |

**Table S5.** Induced Fit Docking (redocking) for the top hit compounds.

| S.no    | Hydrophobic interaction | H-bond interaction                                | Glide score (Kcal/mol) |
|---------|-------------------------|---------------------------------------------------|------------------------|
| DB03213 | ALA-141                 | ASP-161, GLU-208                                  | -10.167                |
| DB01705 |                         | GLU-208, ASP-161, CYX-22, GLY-20                  | -9.806                 |
| DB02559 |                         | GLU-208                                           | -10.207                |
| DB15199 | ALA-141                 | ASP-161, GLY-23, SER-64, GLU-117, GLU-208, ASN-69 | -9.253                 |
| DB00183 | TRP-184, LEU-160        | ASP-161, GLN-19, GLY-66,                          | -9.011                 |
| DB02704 | CYS-25, TRP-184         | ASP-161, SER-64, GLY-66, GLY-23, GLY-19           | -11.177                |
| DB03395 | TRP-184                 | ASP-161, HIE-162, SER-64,                         | -10.856                |
| DB04593 | MET-68, LEU-160         | GLU-208, ASN-69, GLY-66, GLN-19, GLY-23, ASP-161  | -9.557                 |
